# Supplementary material for: How many neurons are sufficient for perception of cortical activity?
Source: eLife journal article supplement (doi:10.7554/elife.58889), 2020-10-26

**a** Typical training schedule (~21 days post injection):

| Session | Reward  | Trial-type order | Task                                     | Phase |
|---------|---------|------------------|------------------------------------------|-------|
| 0       | Passive | -                | Habituation                              | 1     |
| 1       | Passive | -                | 1P 10 mW, Catch                          | 1     |
| 2       | Active  | Sequential       | 1P 10, 7.5, 5 mW, Catch                  | 1     |
| 3 - 4   | Active  | Sequential       | 1P 5, 2.5, 1.75, 0.5, 0.25 mW, Catch     | 1     |
| 5 - 6   | Active  | Interleaved      | 1P 250, 200, 150, 100, 50 $\mu$ W, Catch | 1     |
| 7 - 8   | Active  | Interleaved      | 1P 100, 80, 60, 40, 20 $\mu$ W, Catch    | 1     |
| 9       | Active  | Interleaved      | 1P 50 $\mu$ W, 2P 200 cells, Catch       | 2     |
| 10 - 11 | Active  | Interleaved      | 1P 50 $\mu$ W, 2P 200/100 cells, Catch   | 2     |
| 12 - n  | Active  | Interleaved      | 2P $\leq$ 200 cells, Catch               | 3     |

**b**

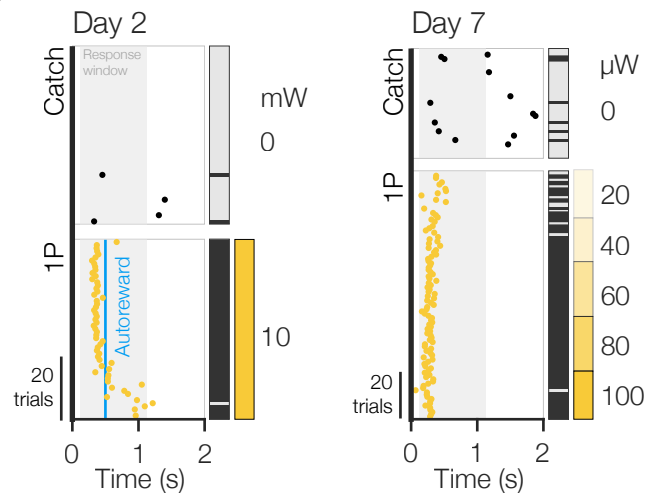

**c**

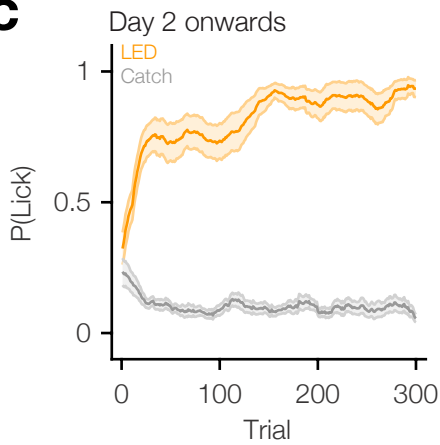

**d**

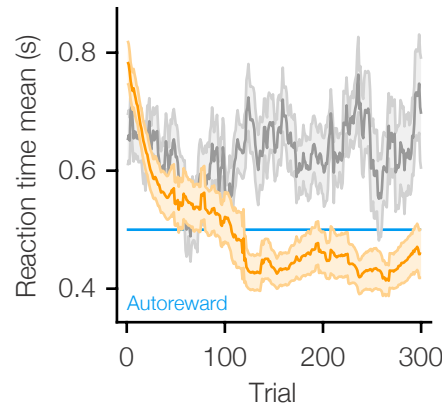

**e**

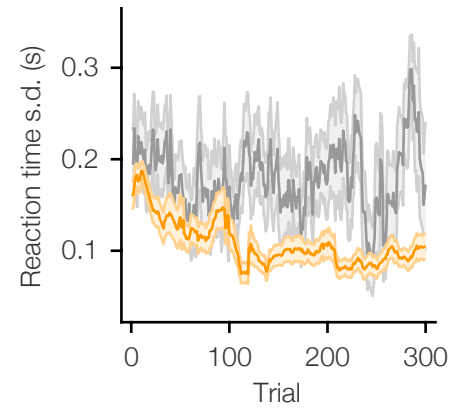

**f**

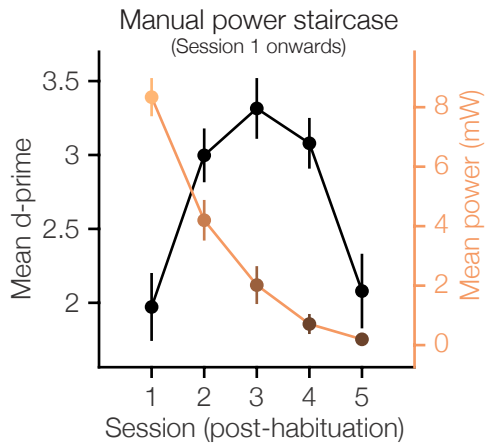

**g**

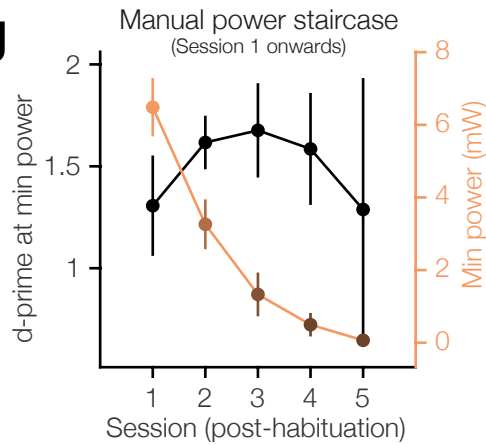

**h**

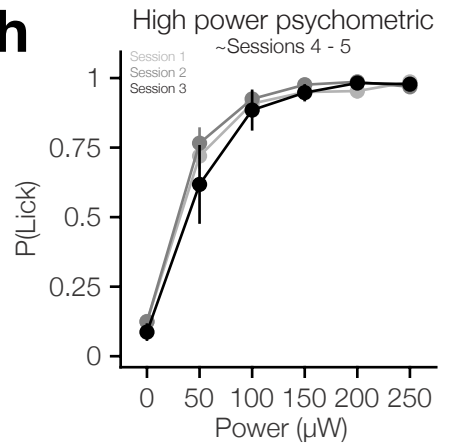

**i**

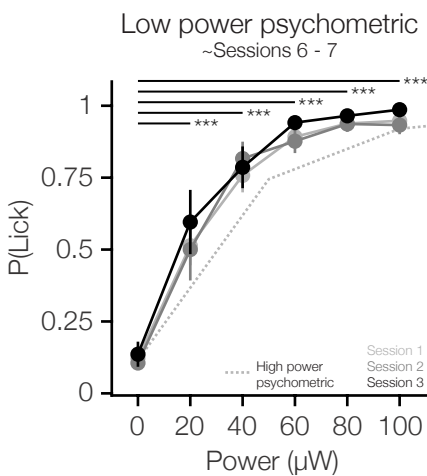

**j**

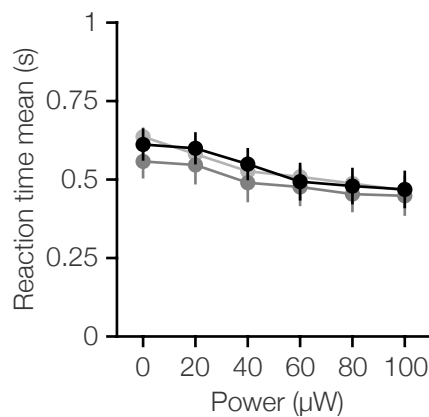

**k**

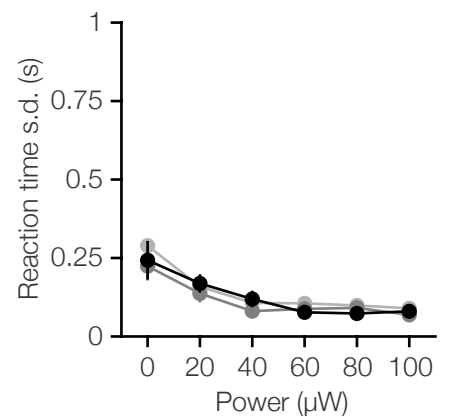

Supplement: supp [file elife-58889-supp-v1.zip › elife_poa_e58889_Figure_1_figure_supplement_3.pdf]
