# Supplementary material for: How many neurons are sufficient for perception of cortical activity?
Source: eLife journal article supplement (doi:10.7554/elife.58889), 2020-10-26
Supplement: supp [file elife-58889-supp-v1.zip]

Archive with 13 entries (13 files):
- elife_poa_e58889_Transparent_Reporting_File.pdf
- elife_poa_e58889_Figure_1_figure_supplement_1.pdf
- elife_poa_e58889_Figure_1_figure_supplement_2.pdf
- elife_poa_e58889_Figure_1_figure_supplement_3.pdf
- elife_poa_e58889_Figure_1_figure_supplement_4.pdf
- elife_poa_e58889_Figure_1_figure_supplement_5.pdf
- elife_poa_e58889_Figure_1_figure_supplement_6.pdf
- elife_poa_e58889_Figure_2_figure_supplement_1.pdf
- elife_poa_e58889_Figure_2_figure_supplement_2.pdf
- elife_poa_e58889_Figure_2_figure_supplement_3.pdf
- elife_poa_e58889_Figure_3_figure_supplement_1.pdf
- elife_poa_e58889_Figure_3_figure_supplement_2.pdf
- elife_poa_e58889_Figure_3_figure_supplement_3.pdf
