# Supplementary material for: How many neurons are sufficient for perception of cortical activity?
Source: eLife journal article supplement (doi:10.7554/elife.58889), 2020-10-26

**a**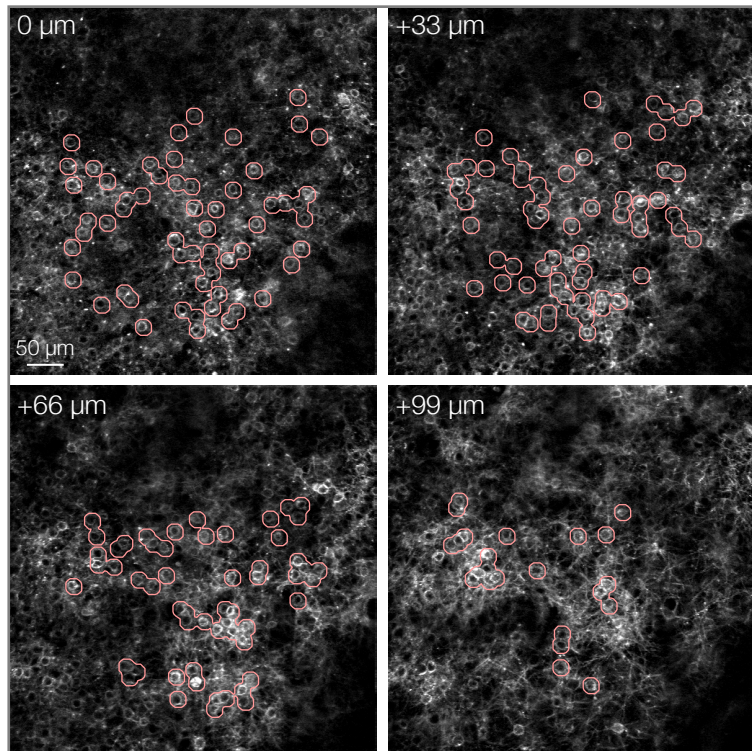**b**

*Mapping protocol:*

- 4 x 50 cell groups
- 0.5 s inter-group interval
- 10 spirals at 20 Hz
- 0.5 s stimulation time
- 6 mW/cell
- 10 repeats
- 10 s inter-repeat interval

**c**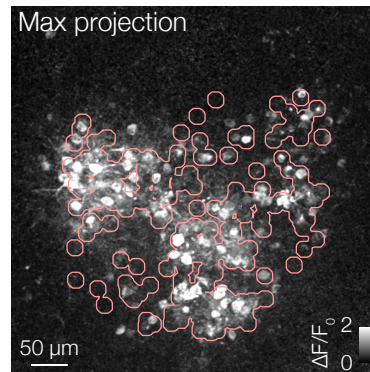**d**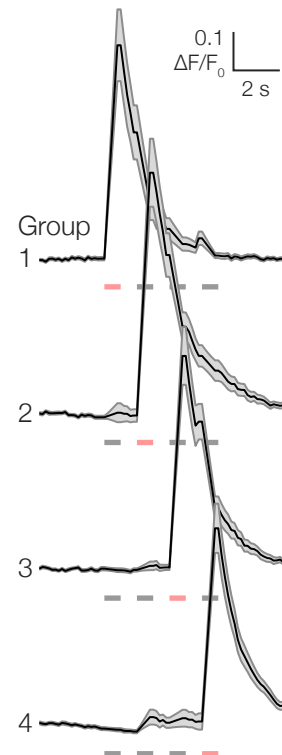

Supplement: supp [file elife-58889-supp-v1.zip]
