# Supplementary figures and images for: How many neurons are sufficient for perception of cortical activity?
Source: eLife journal article supplement (doi:10.7554/elife.58889), 2020-10-26

**a**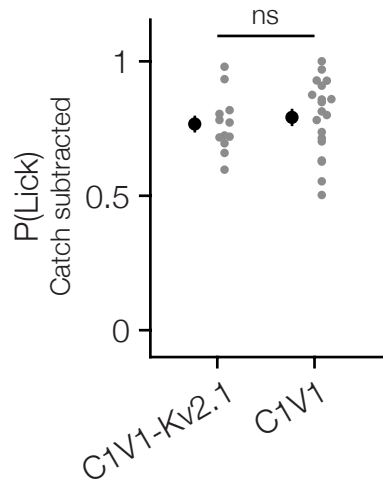**b**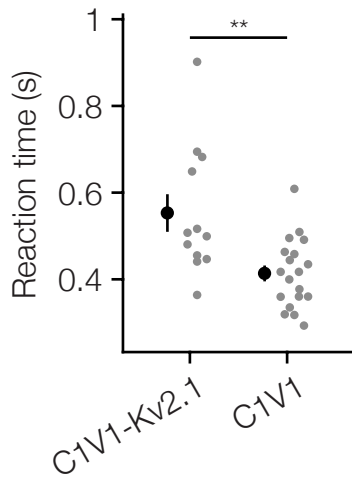**c**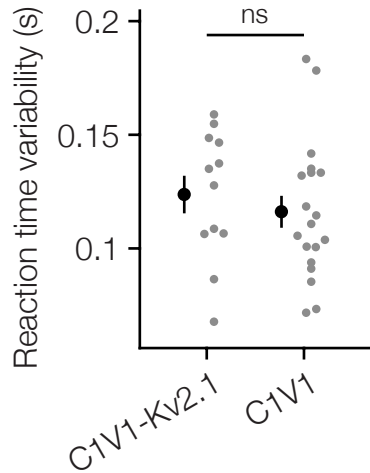

Supplement: supp [file elife-58889-supp-v1.zip]

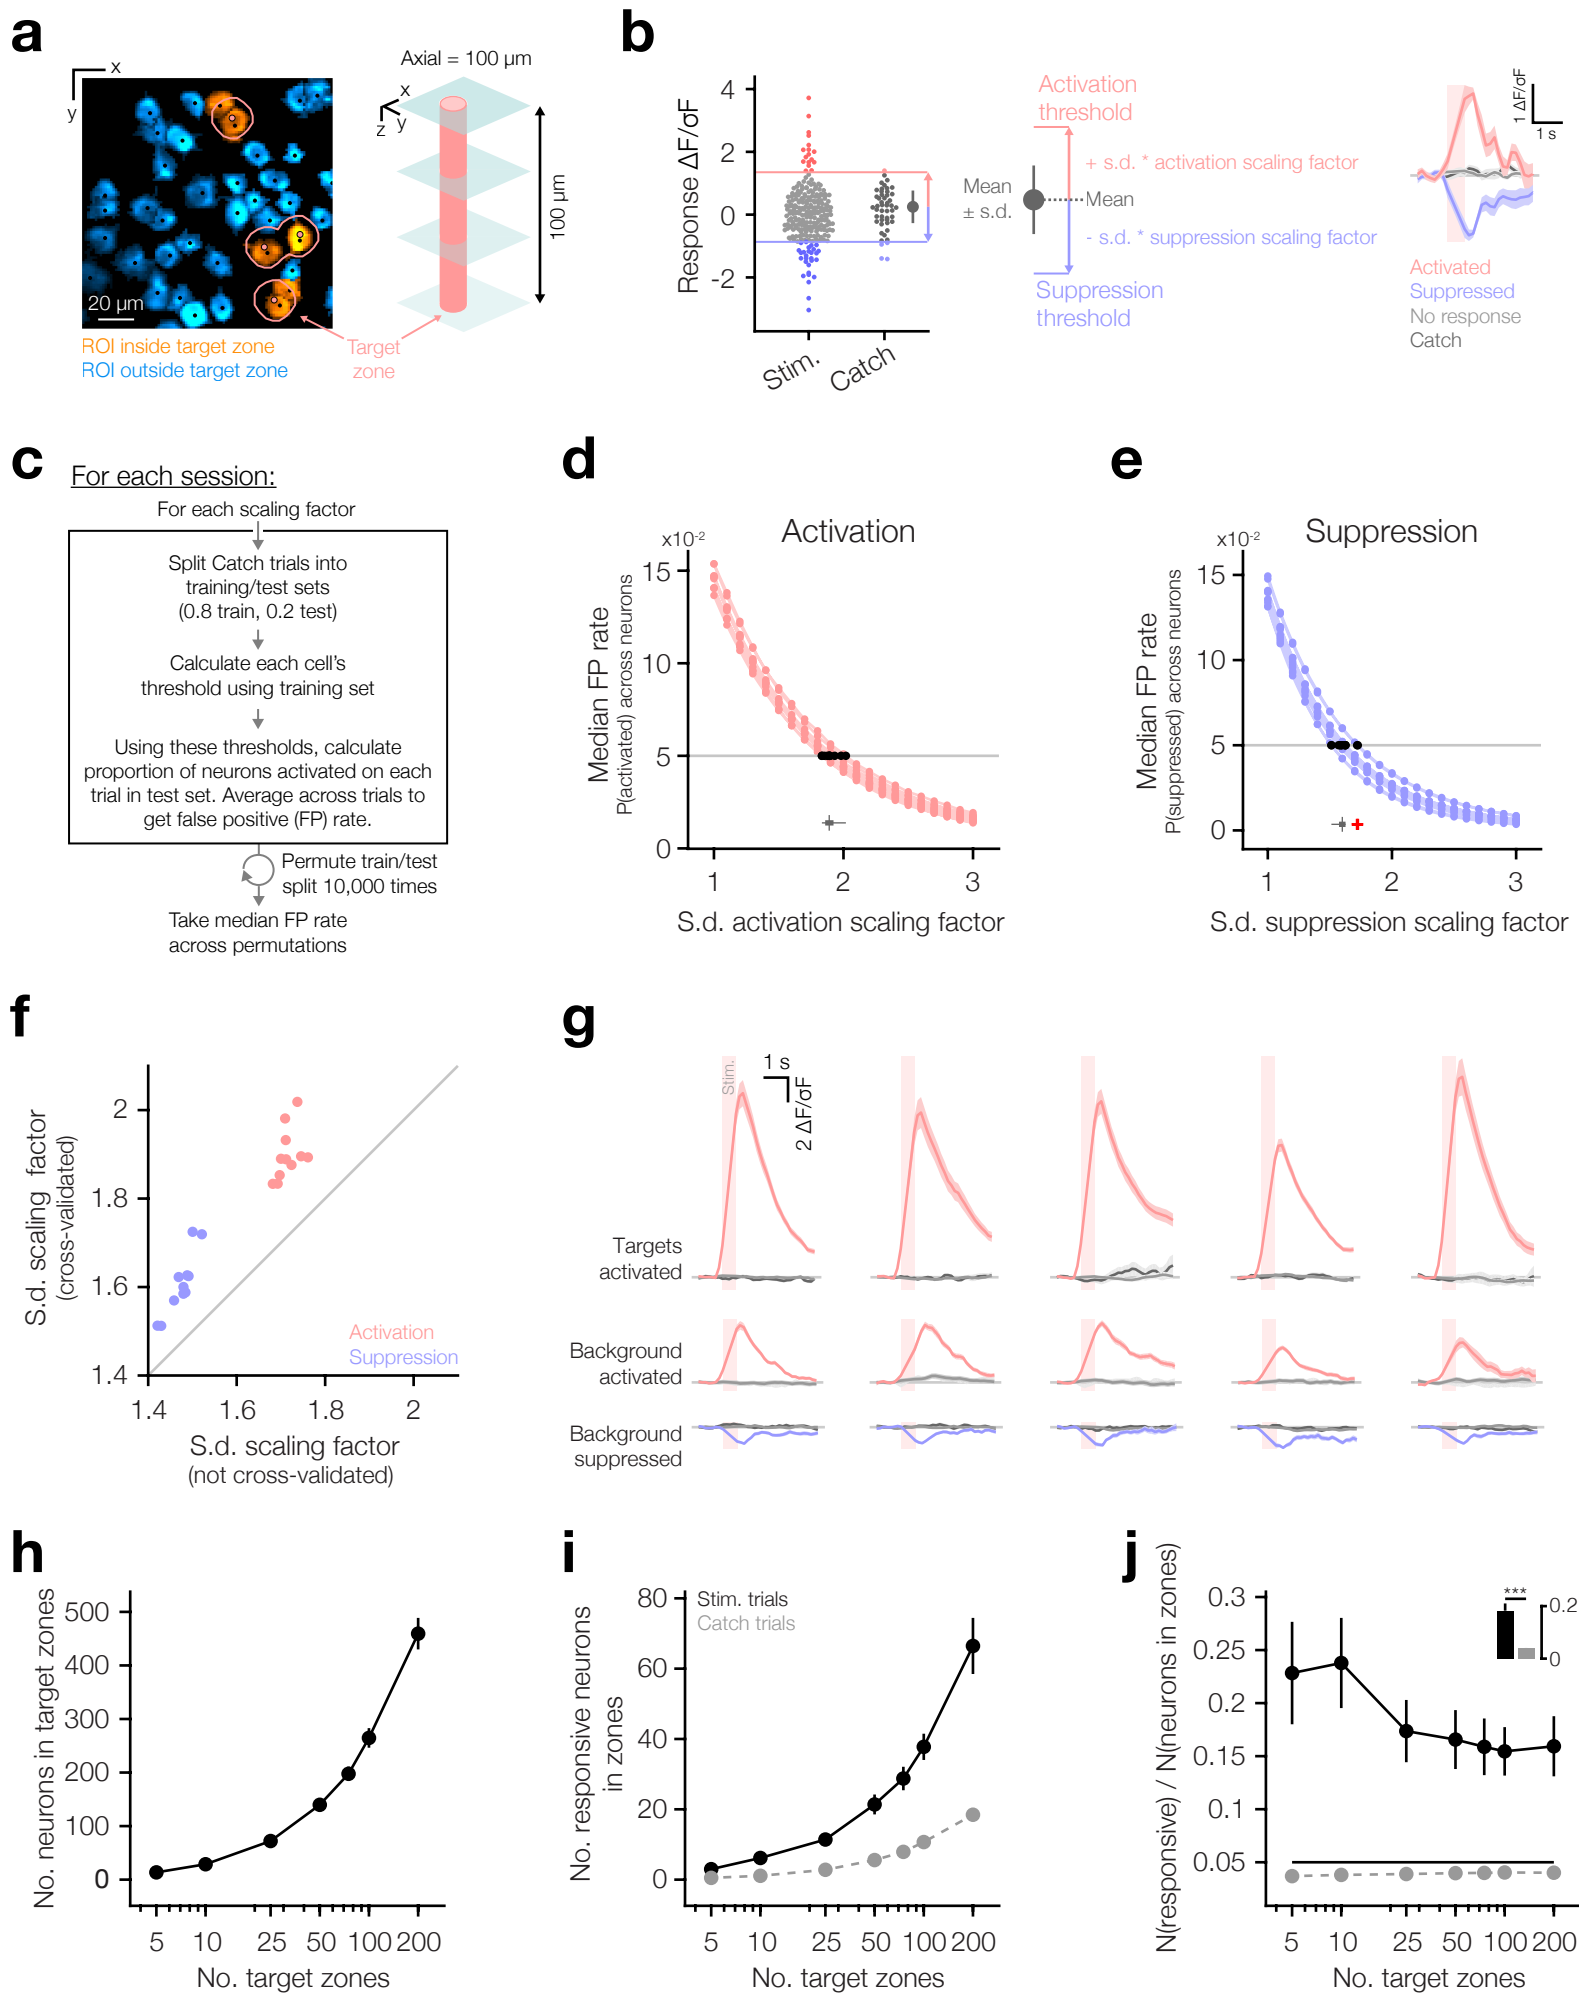

Dalglish Figure 2 - figure supplement 1

Supplement: supp [file elife-58889-supp-v1.zip]

**a**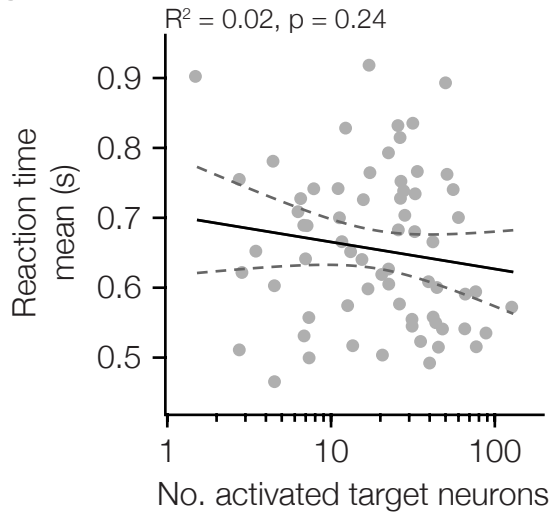**b**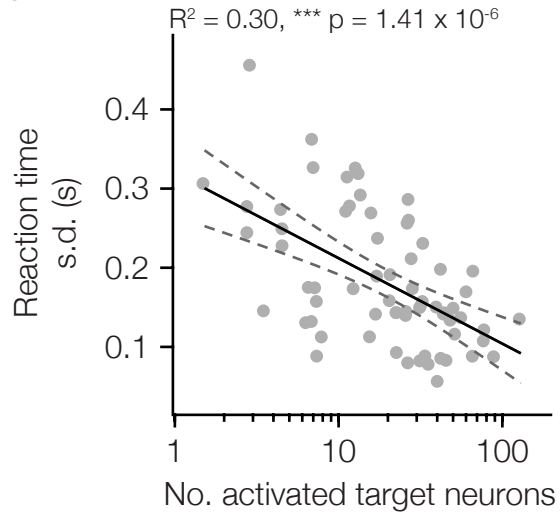

Supplement: supp [file elife-58889-supp-v1.zip]

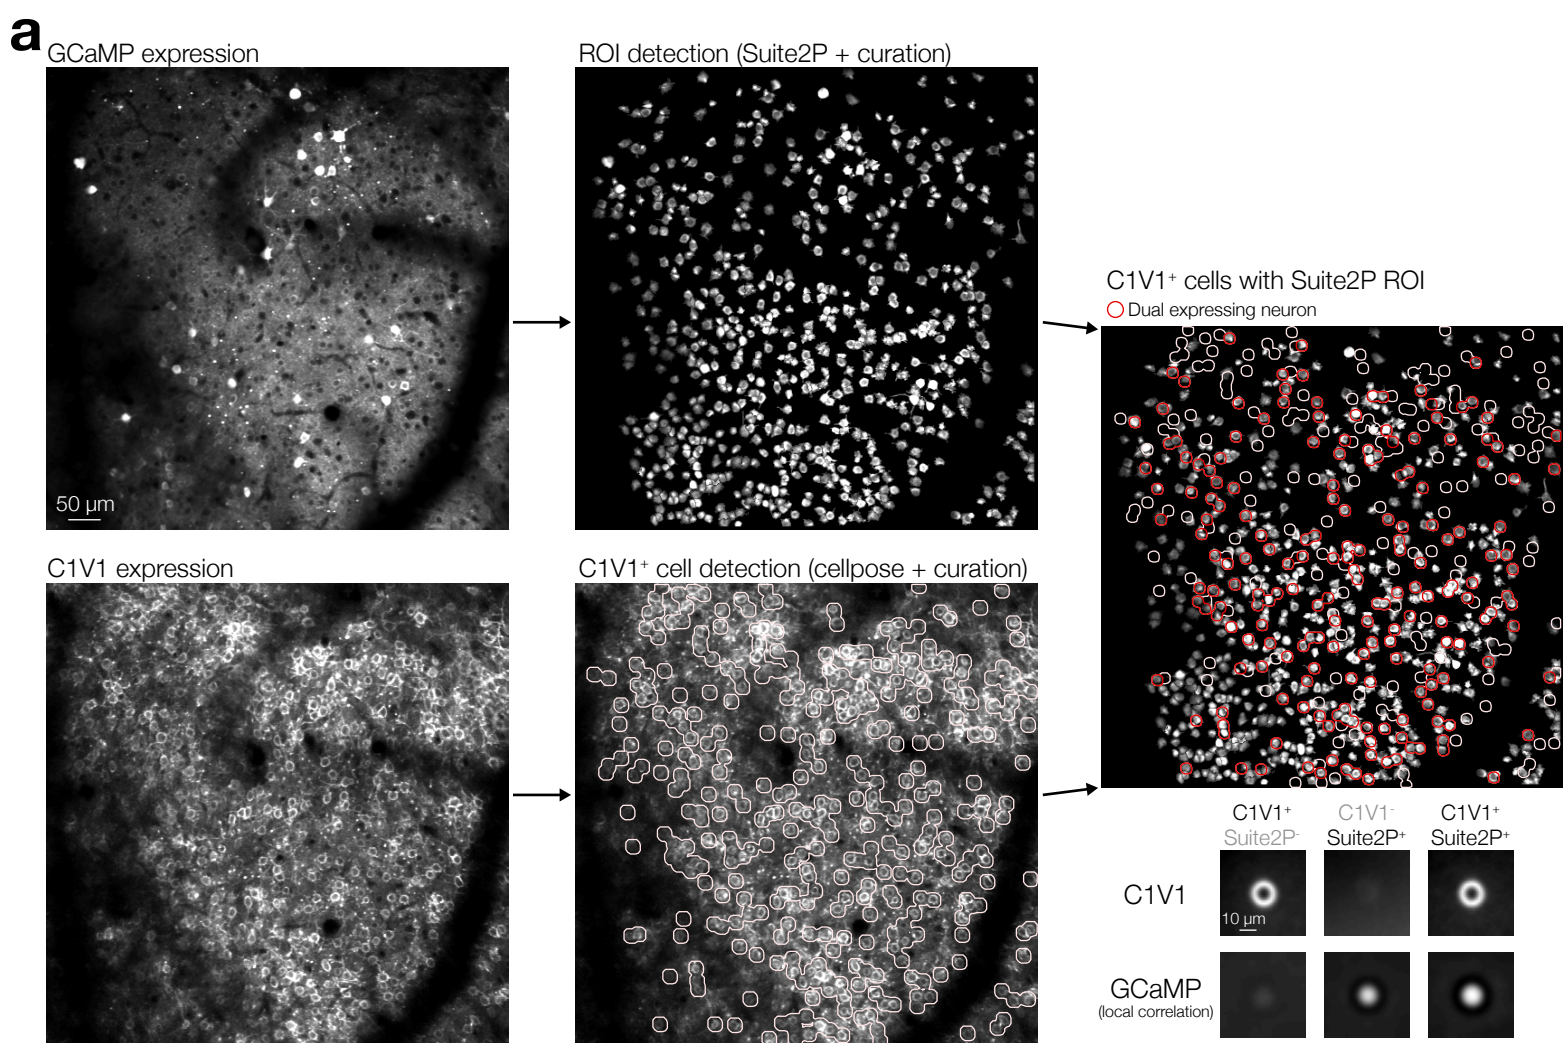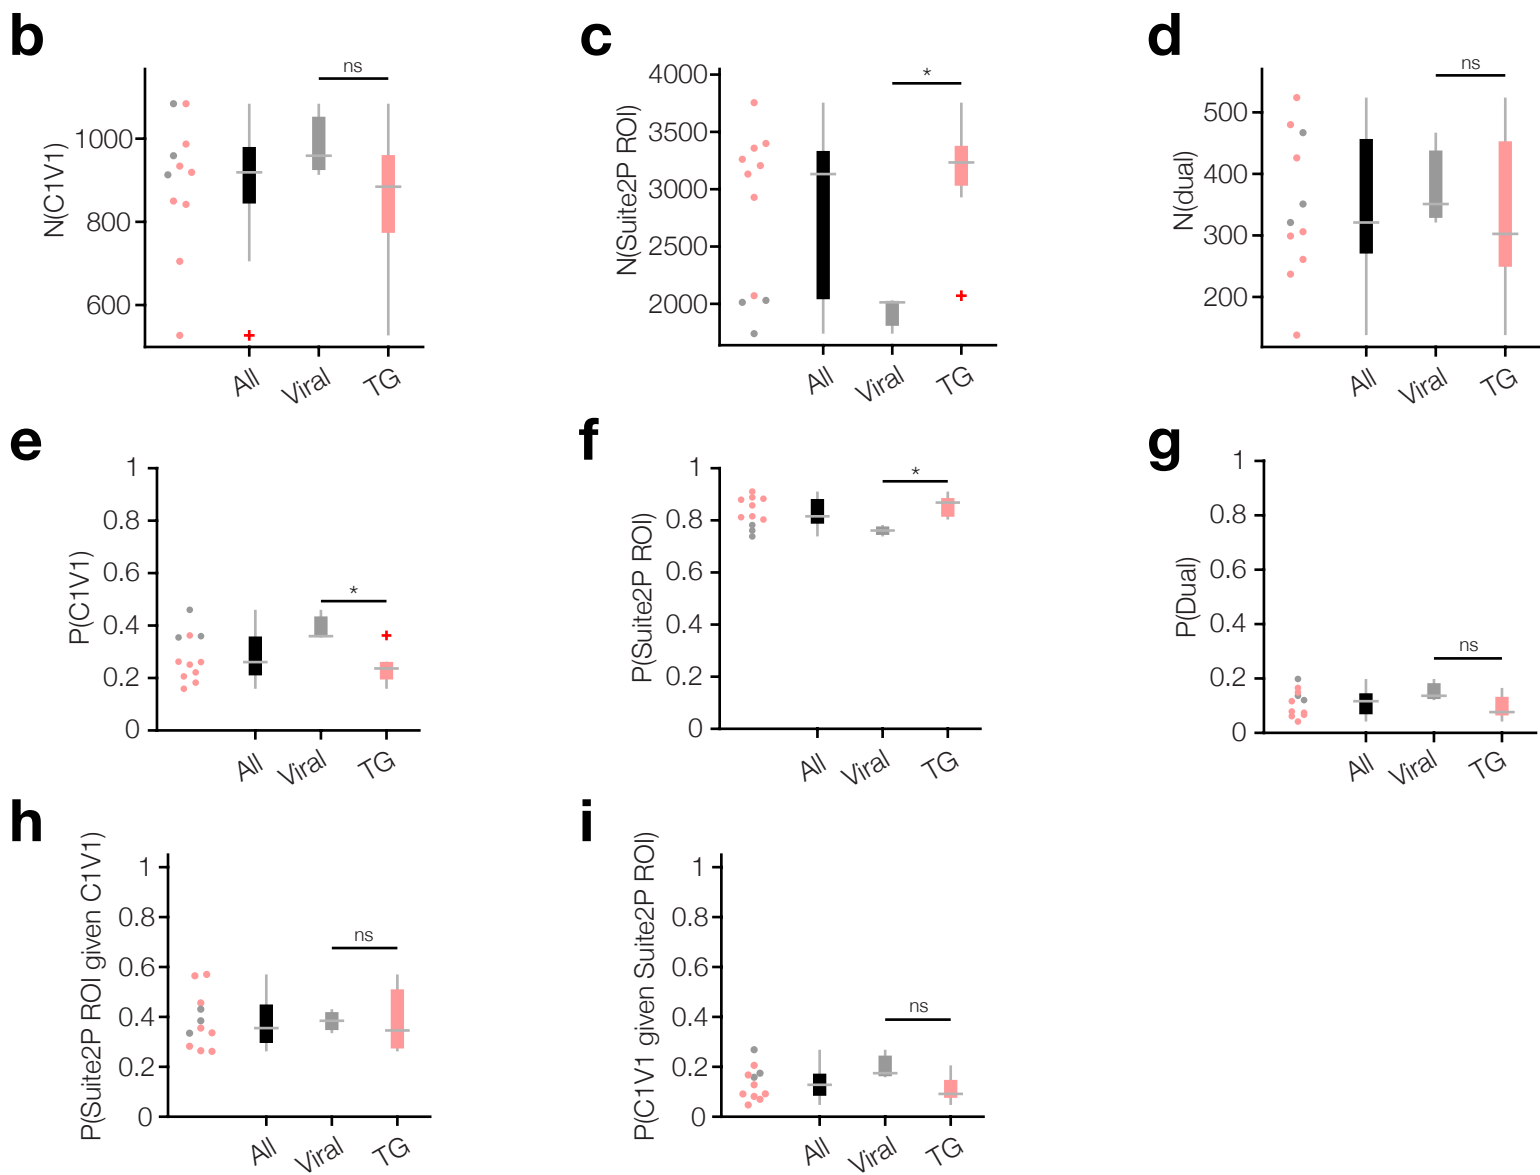

Supplement: supp [file elife-58889-supp-v1.zip]

**a**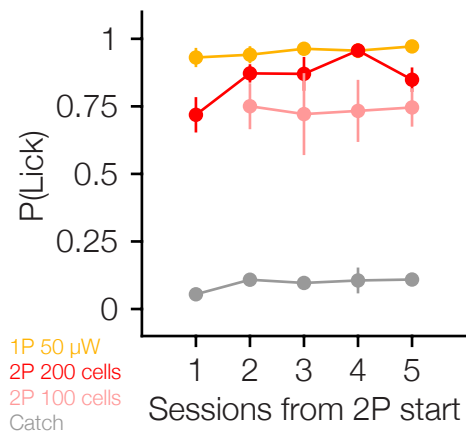**b**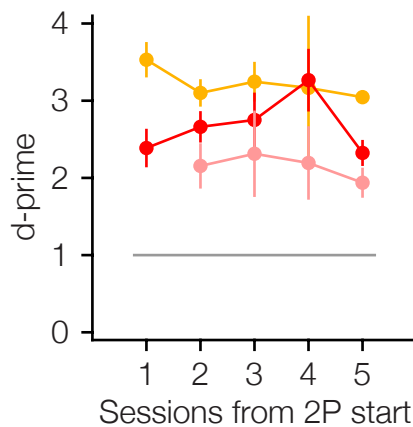**c**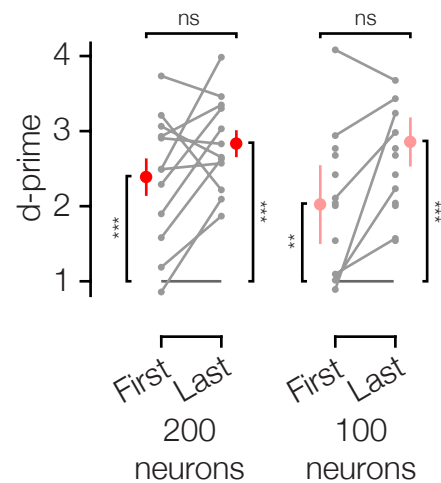**d**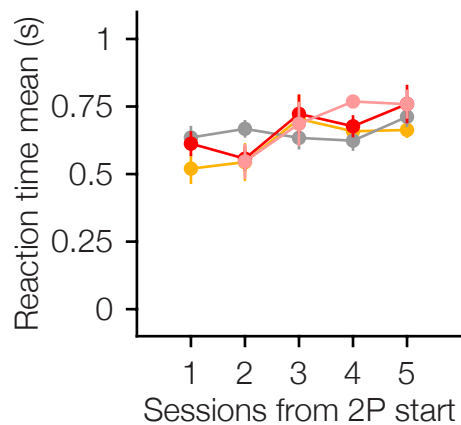**e**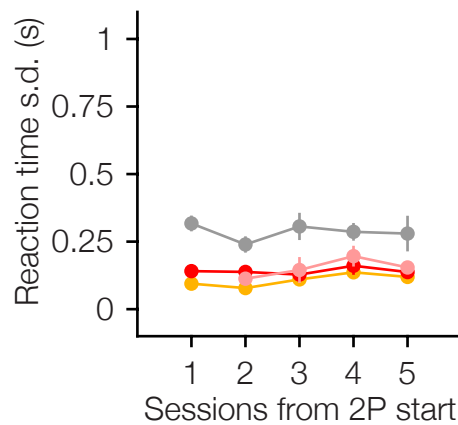**f**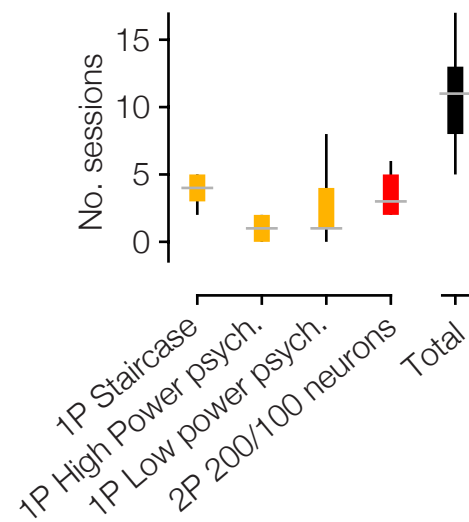

Supplement: supp [file elife-58889-supp-v1.zip]

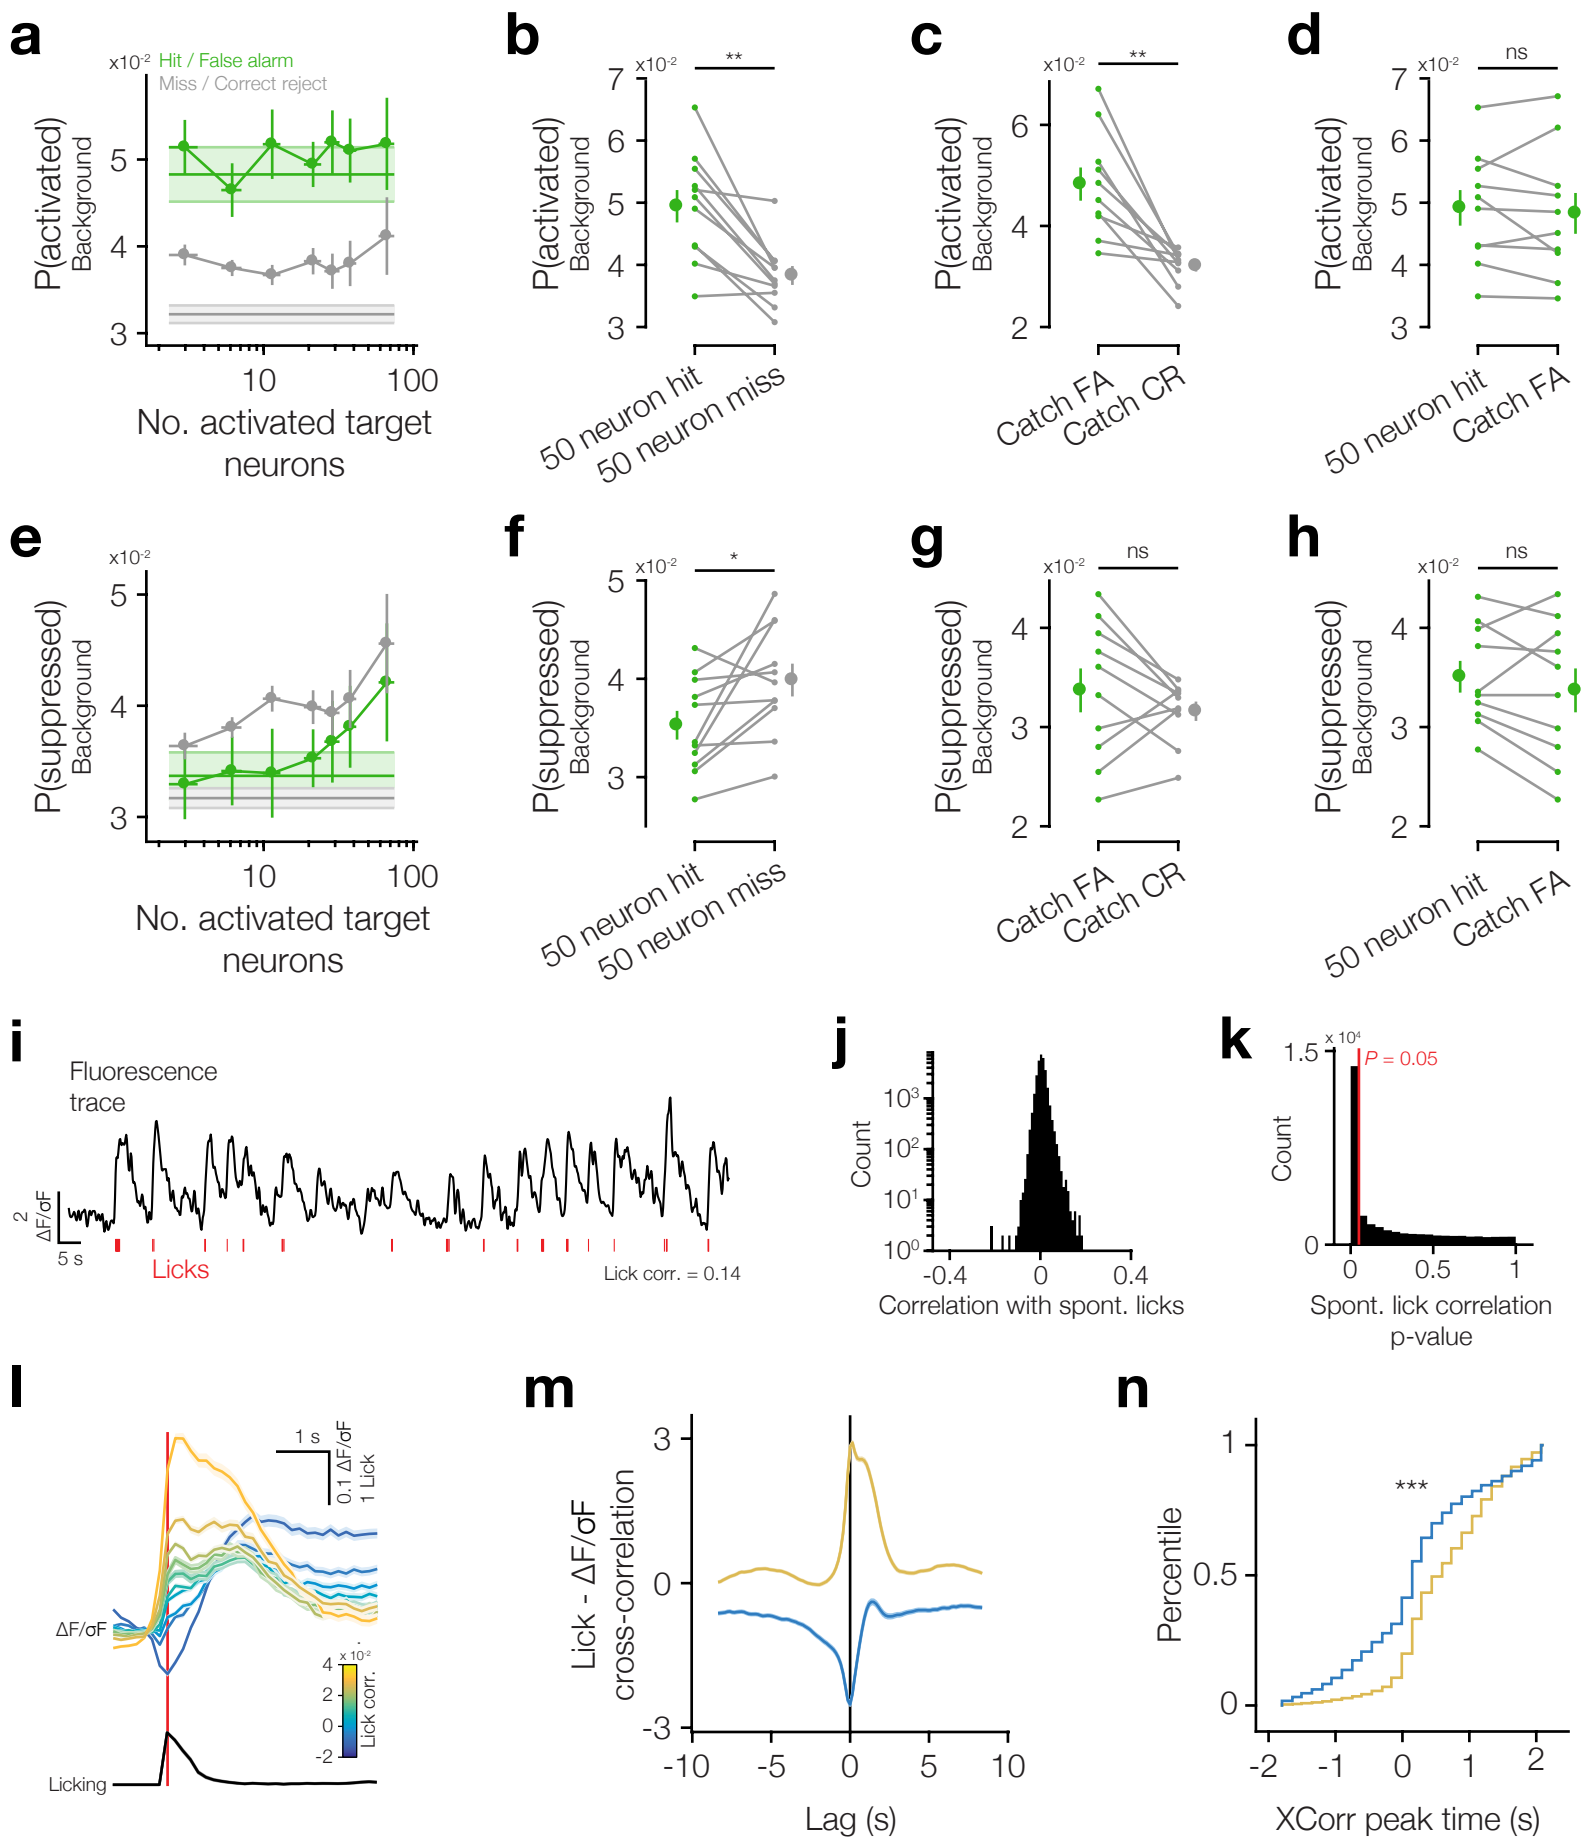

**o** Aim: ensure 50:50 ratio of Hits:Misses for all trial types

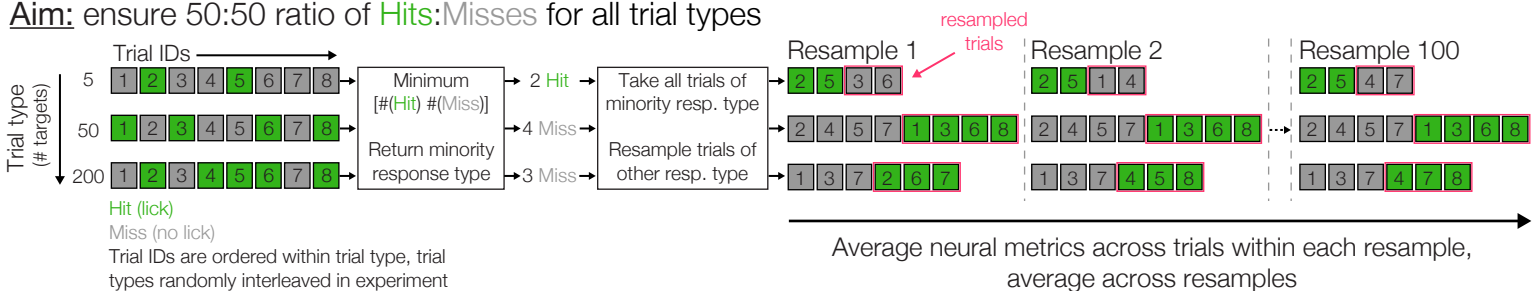

Supplement: supp [file elife-58889-supp-v1.zip]

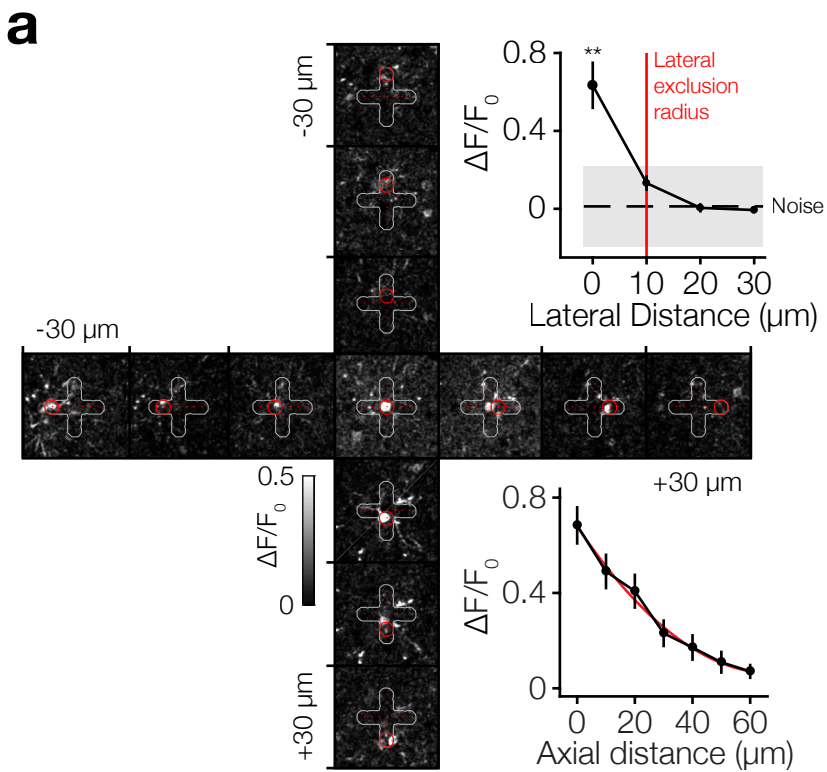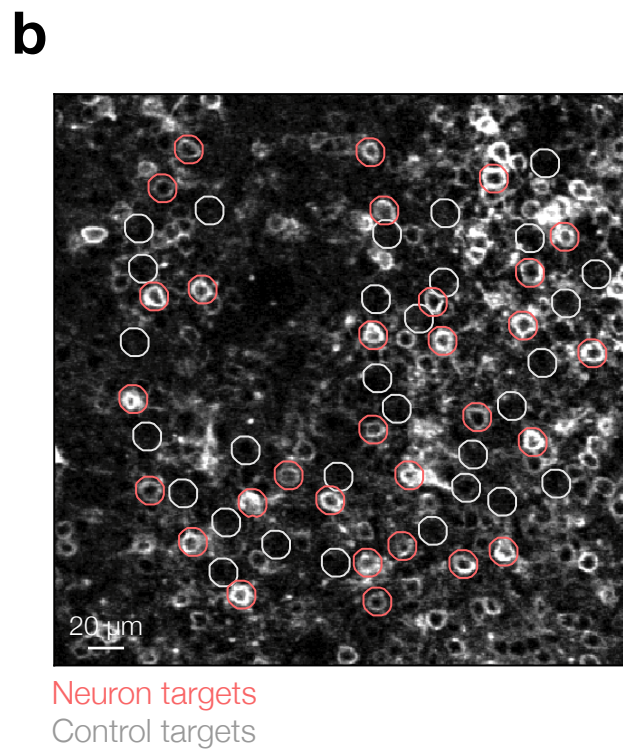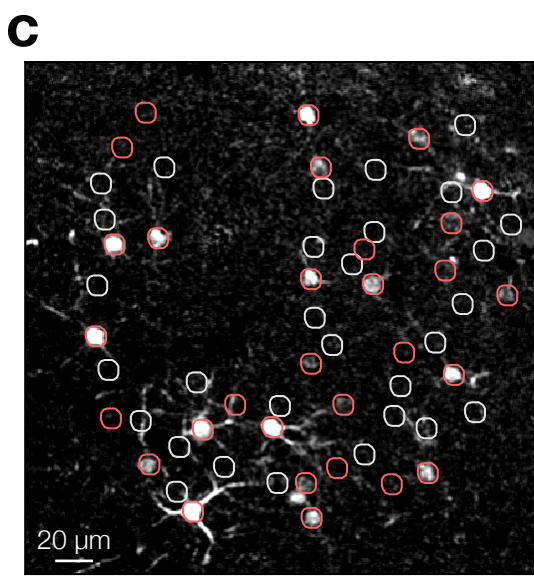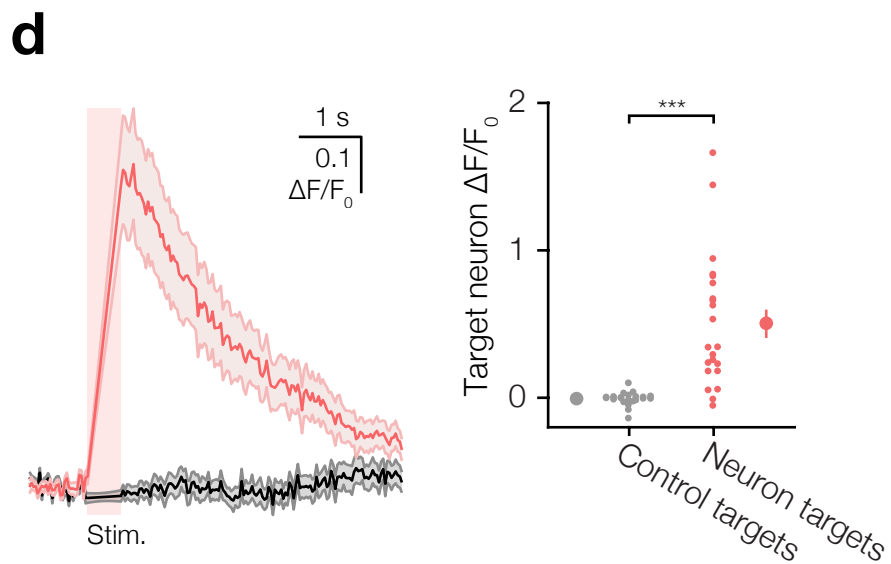

Supplement: supp [file elife-58889-supp-v1.zip › elife_poa_e58889_Figure_1_figure_supplement_2.pdf]

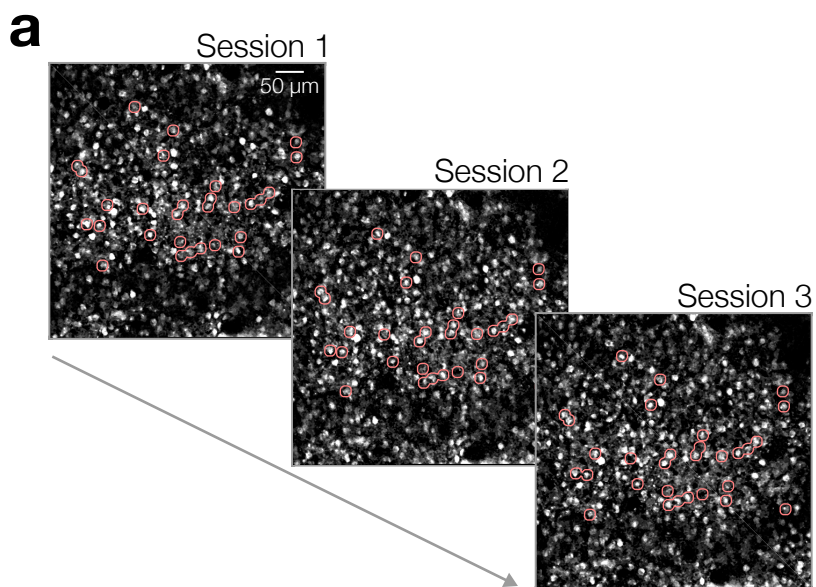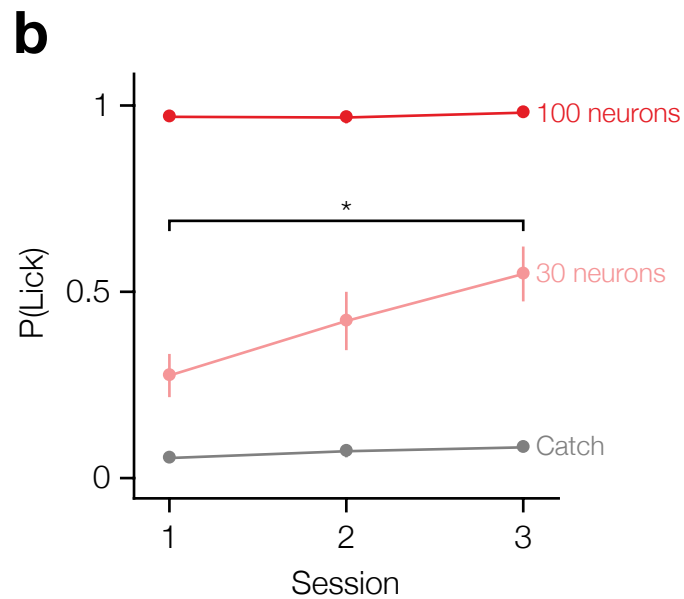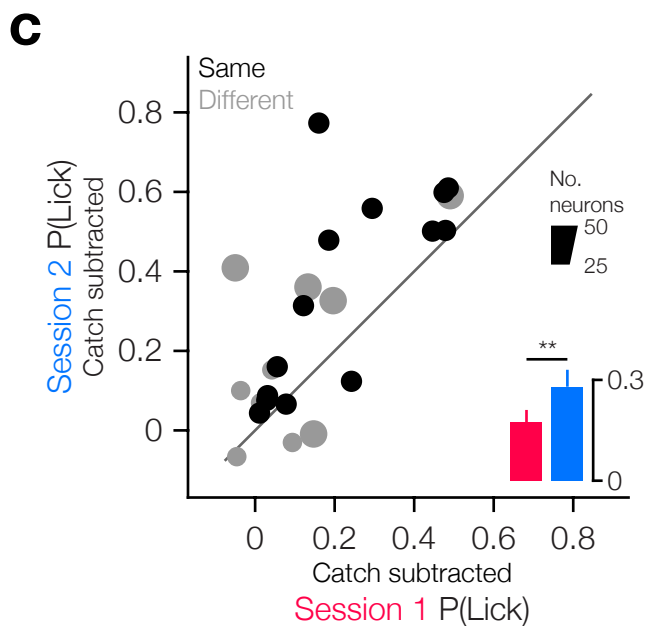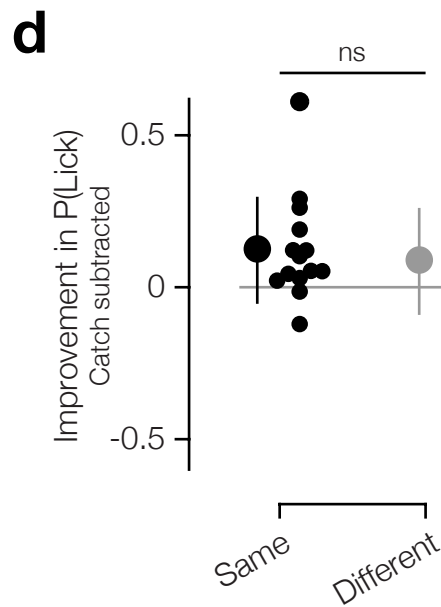

Supplement: supp [file elife-58889-supp-v1.zip › elife_poa_e58889_Figure_2_figure_supplement_3.pdf]

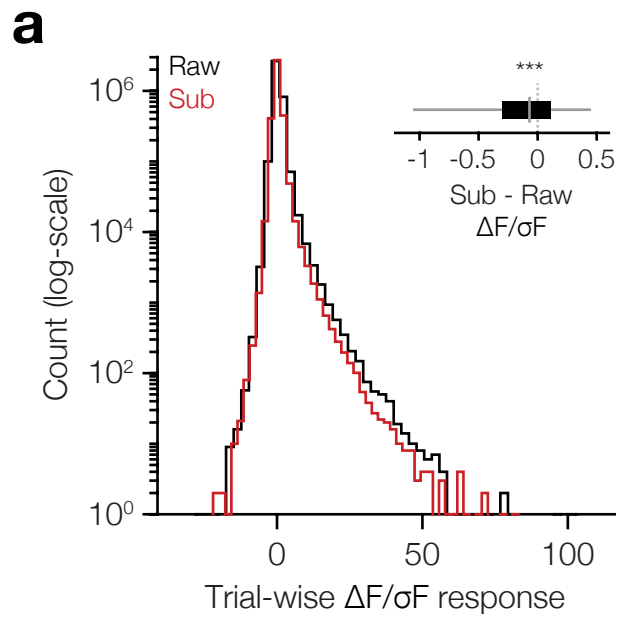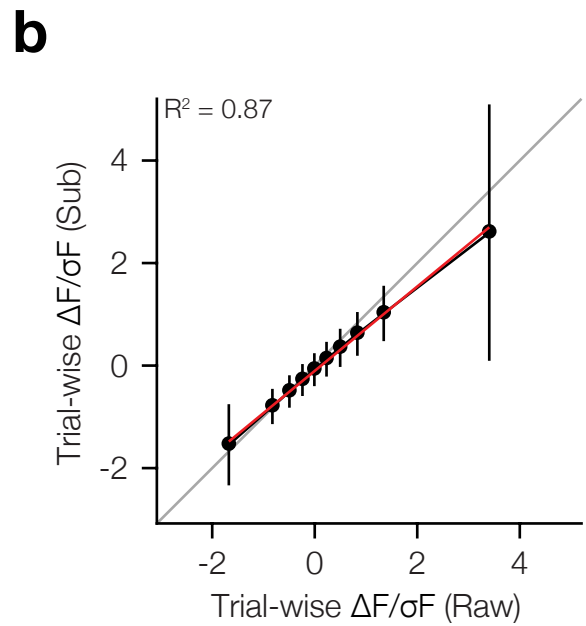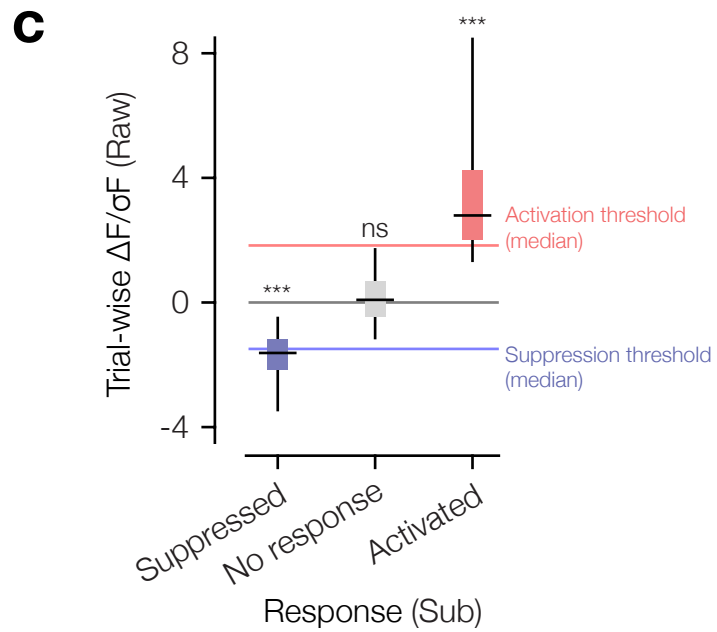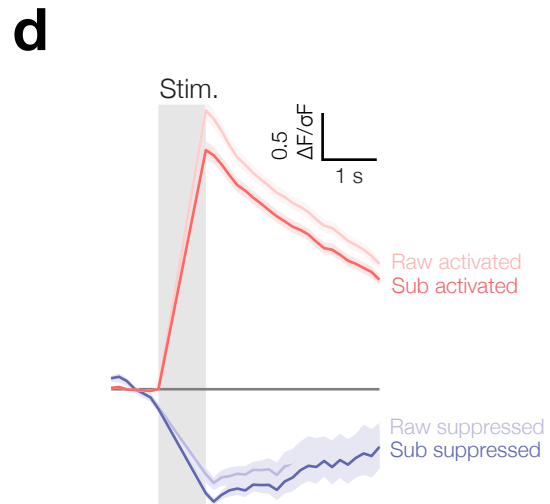

Supplement: supp [file elife-58889-supp-v1.zip › elife_poa_e58889_Figure_3_figure_supplement_2.pdf]

**a**

Activation

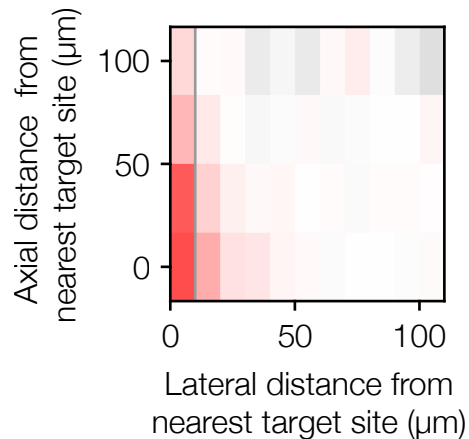

-0.1 0.1  
P(activated)  
spont. sub

Suppression

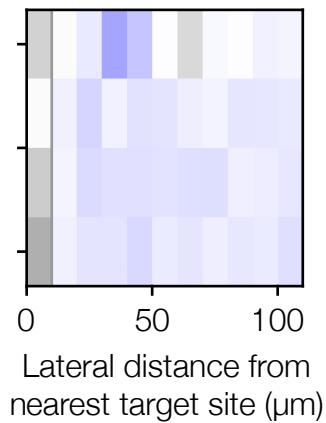

-0.05 0.05  
P(suppressed)  
spont. sub

**b**

Across all depths

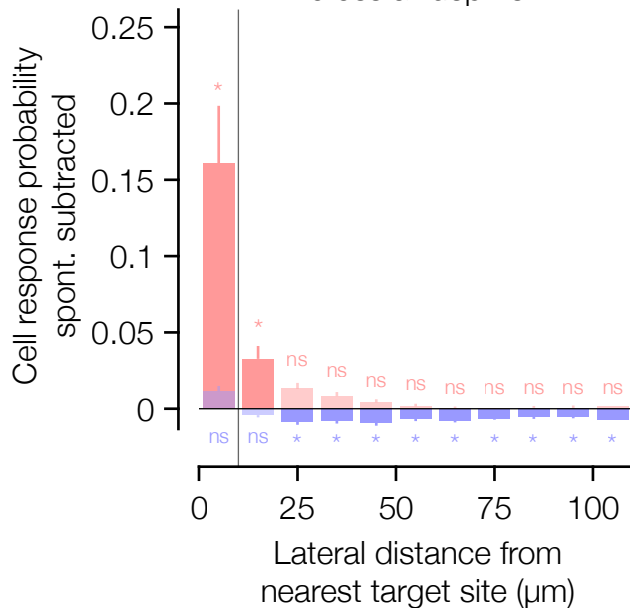

Supplement: supp [file elife-58889-supp-v1.zip › elife_poa_e58889_Figure_3_figure_supplement_3.pdf]
